# Supplementary material for: Navigating Cognitive Aging: A Meta-Analysis of Randomized Placebo-Controlled Trials Assessing the Impact of LC- PUFAs on Elderly Brain Function.
Source: Research Square preprint supplement (doi:10.21203/rs.3.rs-6940888/v1), 2025-09-23
Supplement: Supplementary file 3 [file ee935933c63920be4cba4cf7.docx]

| MQS | | 18 | 18 |
| --- | --- | --- | --- |
| Conclusion | | Positive effect | Positive effect |
| FSIQ  (Mean, Std) | | 117.38, 4.68 | 115.37, 6.52 |
| Duration  (months) | | 24 | 12 |
| Intervention group (mg) | EPA | - | - |
| DHA | 2000 | 2000 |
| Sample size | | 240 | 240 |
| Characteristics | | MCI | MCI |
| Age (years) | | 73.71±2.24 | 74.49±2.65 |
| Author (ref) | | Zhang Y-P, et al.38 | Zhang Y-P, et al.39 |
